# Supplementary material for: An iridium(iii) complex of oximated 2,2′-bipyridine as a sensitive phosphorescent sensor for hypochlorite
Source: Royal Society of Chemistry journal article supplement (doi:10.1039/c1an15030h), 2011-01-01
Supplement: c1an15030h.pdf [file c1an15030h.pdf]

---

# Electronic Supplementary Information

## **An Iridium(III) Complex with Oximated 2,2'-Bipyridine as a Sensitive Phosphorescent Sensor for Hypochlorite**

Na Zhao,<sup>†</sup> Yu-Hui Wu,<sup>†</sup> Rui-Min Wang,<sup>†</sup> Lin-Xi Shi,<sup>†</sup> and Zhong-Ning Chen<sup>\*,†,‡</sup>

*State Key Laboratory of Structural Chemistry, Fujian Institute of Research on the Structure of Matter, Chinese Academy of Sciences, Fuzhou, Fujian 350002, China, and State Key Laboratory of Organometallic Chemistry, Shanghai Institute of Organic Chemistry, Chinese Academy of Sciences, Shanghai 200032, China*

---

## Preparation of ROS and RNS

Various ROS and RNS including  $\text{H}_2\text{O}_2$ ,  $\text{ROO}\cdot$ ,  $\text{NO}\cdot$ ,  $\cdot\text{O}_2^-$ ,  $\cdot\text{OH}$  and  $\text{OCl}^-$  were prepared according to the following methods.<sup>1,2</sup>

The aqueous solutions of  $\text{H}_2\text{O}_2$  (30%) and  $\text{NaClO}$  (13%) were purchased from Alfa Aera Chemical Co.

### Preparation of $\text{ROO}\cdot$

$\text{ROO}\cdot$  was generated from AAPH [2,2'-azobis(2-amidinopropane)dihydrochloride]. 2,2'-Azobis(2-amidinopropane)dihydrochloride (200  $\mu\text{M}$ ) in deionizer water was added, then stirred at 25 °C for 30 min.

### Preparation of $\text{NO}\cdot$

Nitric oxide was generated from SNP [Sodium Nitroferricyanide (III) Dihydrate]. SNP (final 200  $\mu\text{M}$ ) in deionizer water was added then stirred at 25 °C for 30 min.

### Preparation of $\cdot\text{O}_2^-$

$\cdot\text{O}_2^-$  was generated by xanthine and xanthine oxidase. Xanthine oxidase was added first. After xanthine oxidase was dissolved, xanthine (final 200  $\mu\text{M}$ ) was added and the mixtures were stirred at 25 °C for 1 hour.

### Preparation of $\cdot\text{OH}$

Ferrous perchlorate (200  $\mu\text{M}$ ) and  $\text{H}_2\text{O}_2$  (2 mM) were added at room temperature.

## References:

- 1 Z.-N. Sun, F.-Q. Liu, Y. Chen, P. K. H. Tam and D. Yang, *Org. Lett.*, 2008, **10**, 2171;
- 2 Y.-K. Yang, H. J. Cho, J. Lee, I. Shin and J. Tae, *Org. Lett.*, 2009, **11**, 859.

**Table S1.** Partial Molecular Orbital Compositions (%) of **1** under the TD-DFT Calculations.

| Orbital | Energy (eV) | MO contribution (%) |      |      |      |
|---------|-------------|---------------------|------|------|------|
|         |             | Ir                  | L1   | ppy  |      |
|         |             |                     |      | ppy1 | ppy2 |
| LUMO+6  | -0.8351     | 1.2                 | 93.3 | 2.3  | 3.2  |
| LUMO+5  | -0.8716     | 5.1                 | 26.7 | 21.8 | 46.4 |
| LUMO+3  | -1.4569     | 5.8                 | 3.5  | 44.2 | 46.5 |
| LUMO    | -2.3481     | 4.6                 | 92.8 | 1.4  | 1.2  |
| HOMO    | -5.8070     | 46.3                | 3.9  | 25.0 | 24.8 |
| HOMO-1  | -6.4380     | 19.8                | 4.6  | 37.6 | 38.0 |
| HOMO-2  | -6.5819     | 57.2                | 8.2  | 18.5 | 16.1 |
| HOMO-3  | -6.6843     | 50.6                | 13.4 | 18.1 | 17.9 |
| HOMO-6  | -7.4663     | 4.4                 | 92.1 | 1.3  | 2.2  |

**Table S2.** Singlet Absorptions and Triplet Emission Transitions of **1** by the TD-DFT Calculations in DMF Media.

|     | Transition    | Contri. | <i>E</i> , nm (eV) | O.S.   | Assignment                                              |
|-----|---------------|---------|--------------------|--------|---------------------------------------------------------|
| T1  | HOMO→LUMO     | 94.7%   | 587 (2.11)         | 0.0000 | <sup>3</sup> MLCT/ <sup>3</sup> LLCT                    |
| S1  | HOMO→LUMO     | 100%    | 472 (2.63)         | 0.0010 | <sup>1</sup> MLCT/ <sup>1</sup> LLCT                    |
| S5  | HOMO-1→LUMO   | 70.0%   | 368 (3.37)         | 0.1021 | <sup>1</sup> MLCT/ <sup>1</sup> LLCT                    |
|     | HOMO→LUMO+3   | 14.9%   |                    |        | <sup>1</sup> MLCT/ <sup>1</sup> ILCT                    |
| S21 | HOMO-6→LUMO   | 65.2%   | 289 (4.29)         | 0.2855 | <sup>1</sup> ILCT                                       |
|     | HOMO-3→LUMO+3 | 9.0%    |                    |        | <sup>1</sup> MLCT/ <sup>1</sup> LLCT/ <sup>1</sup> ILCT |
| S36 | HOMO-2→LUMO+5 | 33.8%   | 256 (4.83)         | 0.3715 | <sup>1</sup> MLCT/ <sup>1</sup> ILCT                    |
|     | HOMO-1→LUMO+6 | 30.6%   |                    |        | <sup>1</sup> MLCT/ <sup>1</sup> LLCT                    |

**Table S3.** Partial Molecular Orbital Compositions (%) of **2** under the TD-DFT Calculations.

| Orbital | Energy (eV) | MO contribution (%) |      |      |      |
|---------|-------------|---------------------|------|------|------|
|         |             | Ir                  | L2   | ppy  |      |
|         |             |                     |      | ppy1 | ppy2 |
| LUMO+6  | -0.8580     | 4.7                 | 2.1  | 55.5 | 37.7 |
| LUMO+5  | -0.9045     | 5.1                 | 22.9 | 26.0 | 46.0 |
| LUMO+2  | -1.5834     | 5.0                 | 3.7  | 44.7 | 46.6 |
| LUMO+1  | -1.8126     | 1.2                 | 94.1 | 2.2  | 2.5  |
| LUMO    | -2.5786     | 4.9                 | 92.4 | 1.5  | 1.2  |
| HOMO    | -5.8513     | 45.7                | 3.9  | 25.4 | 25.0 |
| HOMO-1  | -6.4726     | 14.2                | 2.9  | 41.9 | 41.0 |
| HOMO-2  | -6.6453     | 51.1                | 4.4  | 21.4 | 23.1 |
| HOMO-3  | -6.7779     | 51.6                | 8.5  | 17.9 | 22.1 |
| HOMO-6  | -7.5831     | 1.1                 | 97.5 | 0.7  | 0.7  |

**Table S4.** Singlet Absorptions and Triplet Emission Transitions of **2** by the TD-DFT Calculations in DMF Media.

|     | Transition    | Contri. | <i>E</i> , nm (eV) | O.S.   | Assignment                    |
|-----|---------------|---------|--------------------|--------|-------------------------------|
| T1  | HOMO→LUMO     | 100%    | 641 (1.93)         | 0.0000 | <sup>3</sup> MLCT /3LLCT      |
| S1  | HOMO→LUMO     | 100%    | 510 (2.43)         | 0.0009 | <sup>1</sup> MLCT /1LLCT      |
| S5  | HOMO→LUMO+2   | 91.6%   | 375 (3.30)         | 0.0626 | <sup>1</sup> MLCT /1LLCT      |
| S20 | HOMO-6→LUMO   | 57.3%   | 290 (4.27)         | 0.2430 | <sup>1</sup> ILCT             |
|     | HOMO-3→LUMO+1 | 30.7%   |                    |        | <sup>1</sup> MLCT /1LLCT      |
| S37 | HOMO-2→LUMO+5 | 36.5%   | 255 (4.86)         | 0.4202 | <sup>1</sup> MLCT/1ILCT/1LLCT |
|     | HOMO-1→LUMO+6 | 31.3%   |                    |        | <sup>1</sup> ILCT             |

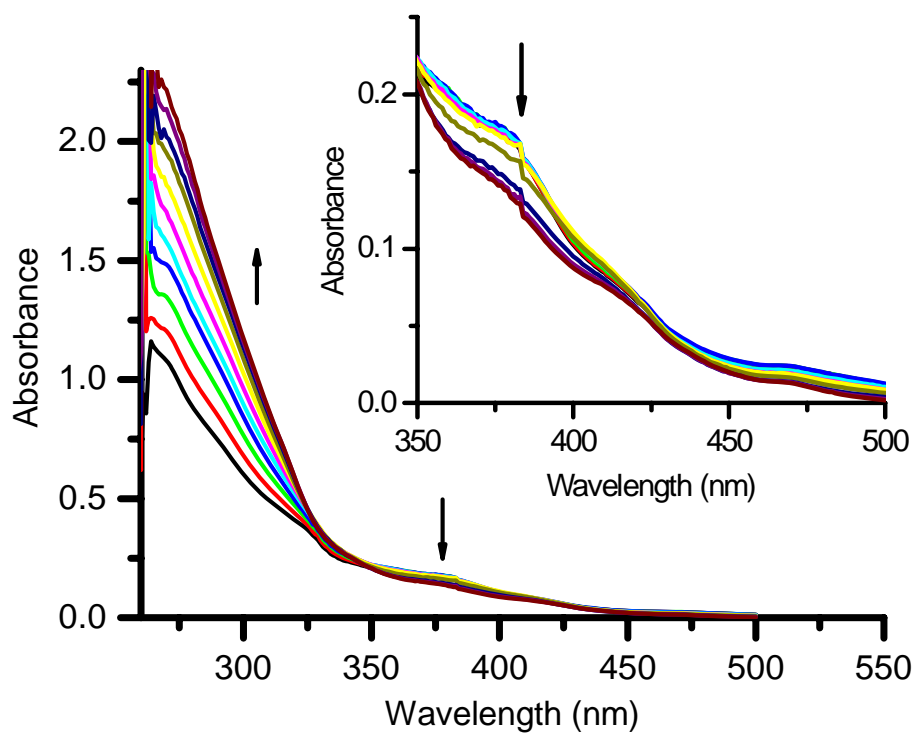

**Fig. S1** The change of UV-vis spectra of complex **1** with  $\text{ClO}^-$  in DMF-HEPES (50 mM, pH 7.2, v/v, 4:1).

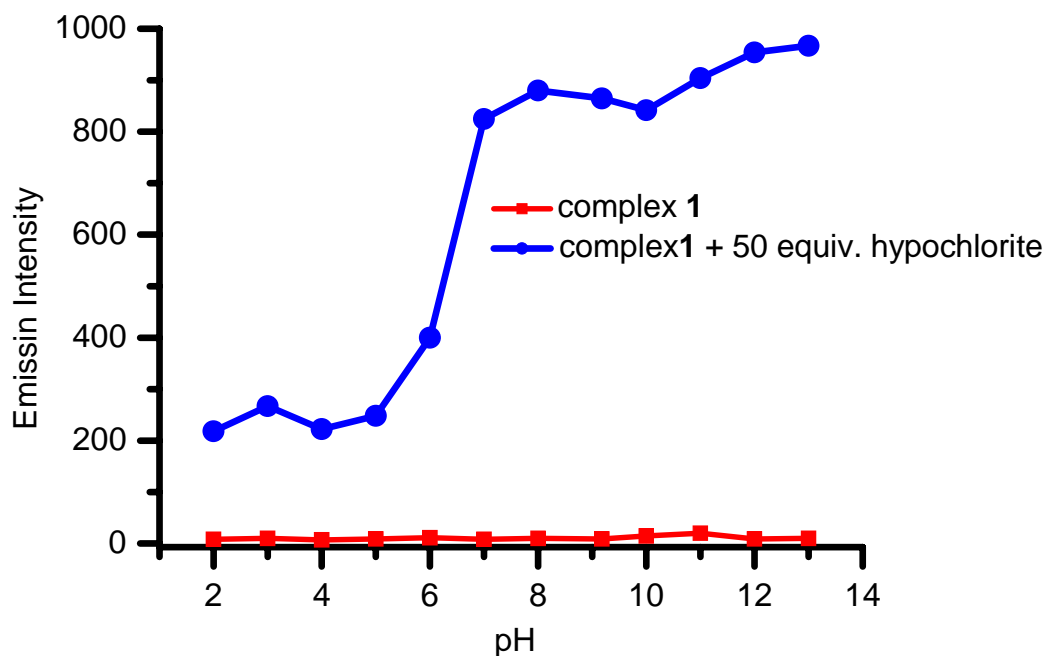

**Fig. S2** The emission intensity of complex **1** (20  $\mu\text{M}$ ) at 587 nm in the absence (■) and presence (●) of 50 equiv.  $\text{ClO}^-$  at various pH values.

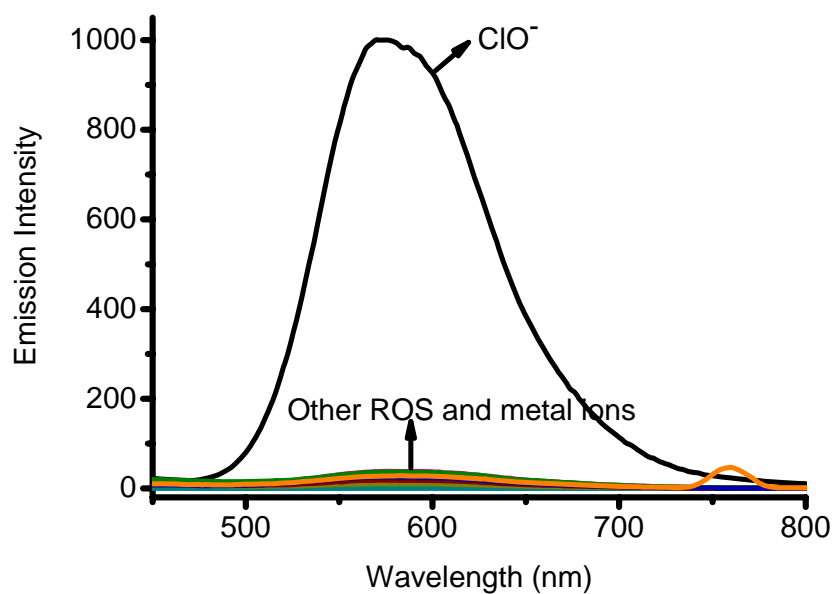

**Fig. S3** the emission spectra of complex **1** (20  $\mu\text{M}$ ) in  $\text{CH}_3\text{CN}$  in response to ROS and other metal ions.

ZN-59 #38 RT: 0.86 AV: 1 NL: 6.01E8  
T: + c ESI Full ms [50.00-1000.00]

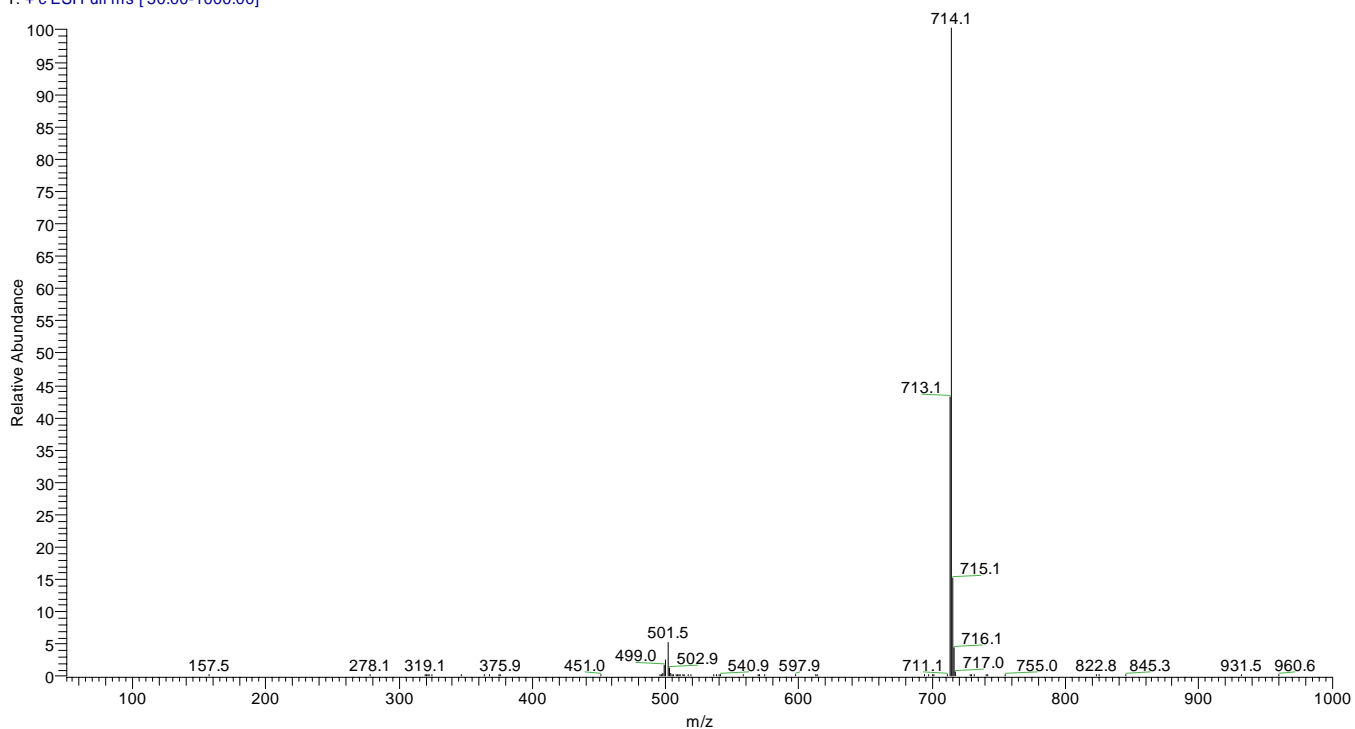

(a)

ZN100401 #79 RT: 2.32 AV: 1 NL: 3.56E7  
T: + c ESI ms [50.00-2000.00]

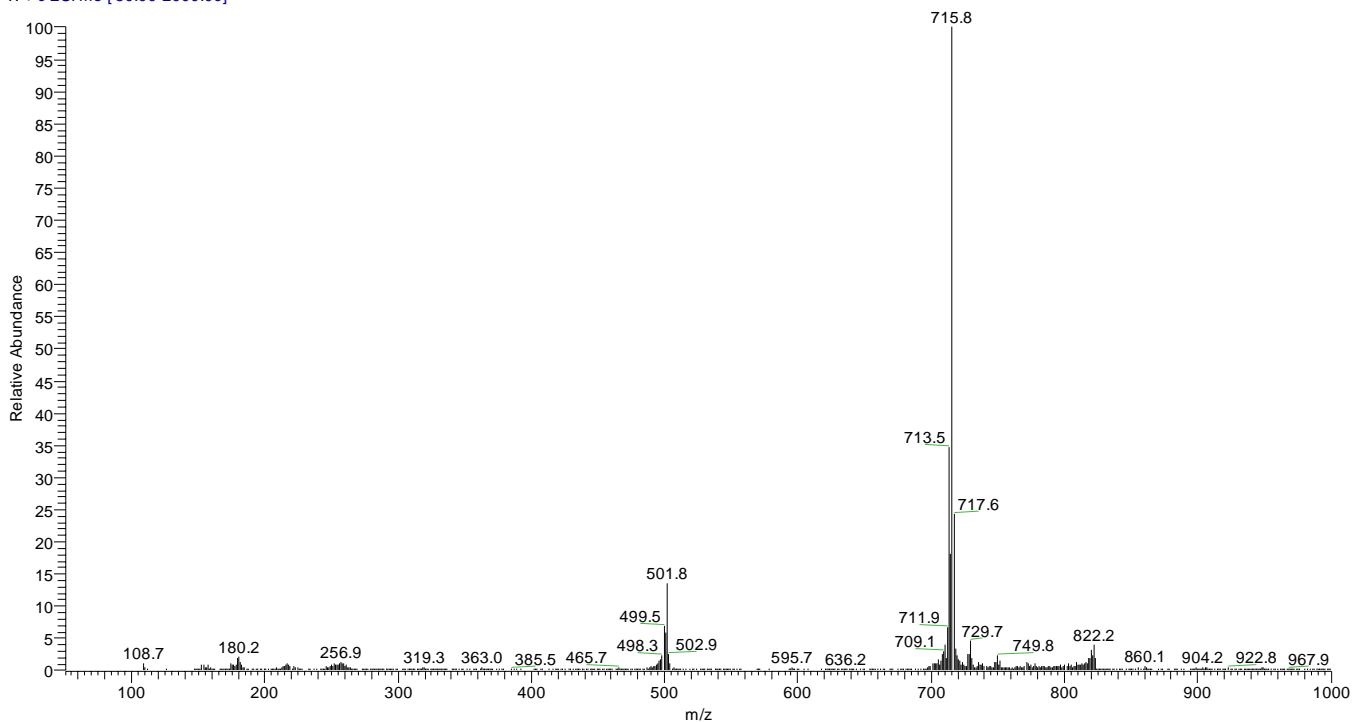

(b)

D:\Data\CZN\zn\ZN-103  
ESI

05/17/2010 03:39:48 PM

ZN-103

ZN-103 #24 RT: 0.76 AV: 1 NL: 4.35E7  
T: + c ESI Full ms [200.00-1000.00]

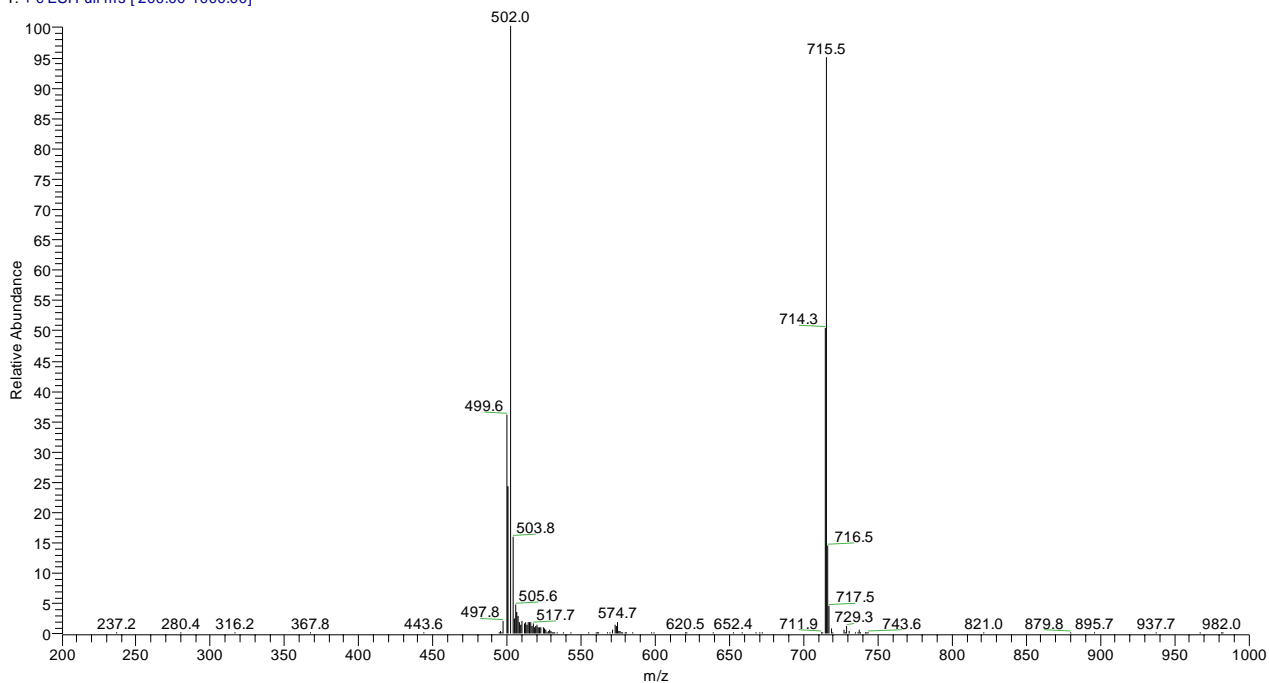

(c)

**Fig. S4** Positive ion ESI-MS. (a) complex **1**, (b) the isolated product of **1** with  $\text{ClO}^-$ , (c) complex **2**.

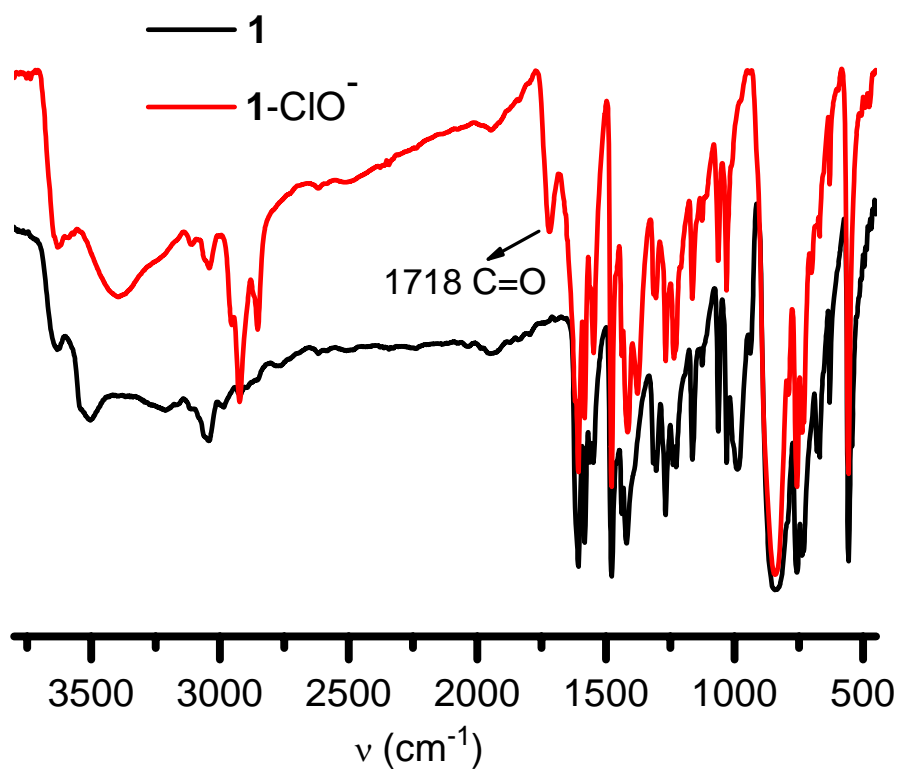

**Fig. S5** The IR spectra of complex **1** and the isolated product of **1** with  $\text{ClO}^-$ .

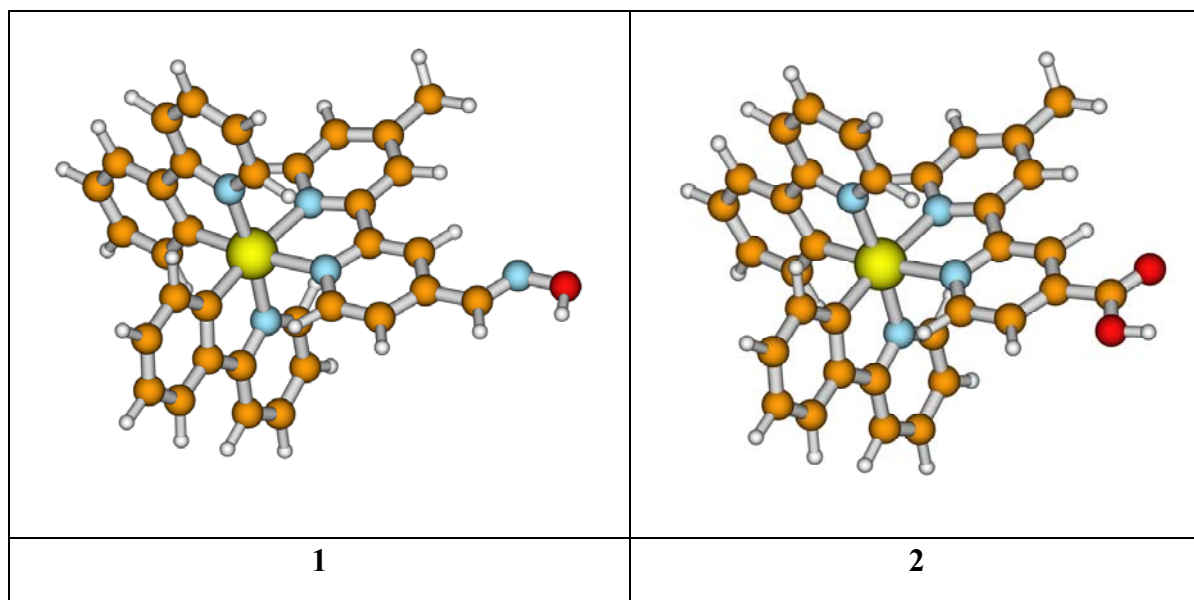

**Fig. S6** Optimized structure of **1** and **2** in the ground state with DFT method at the PBE1PBE level.



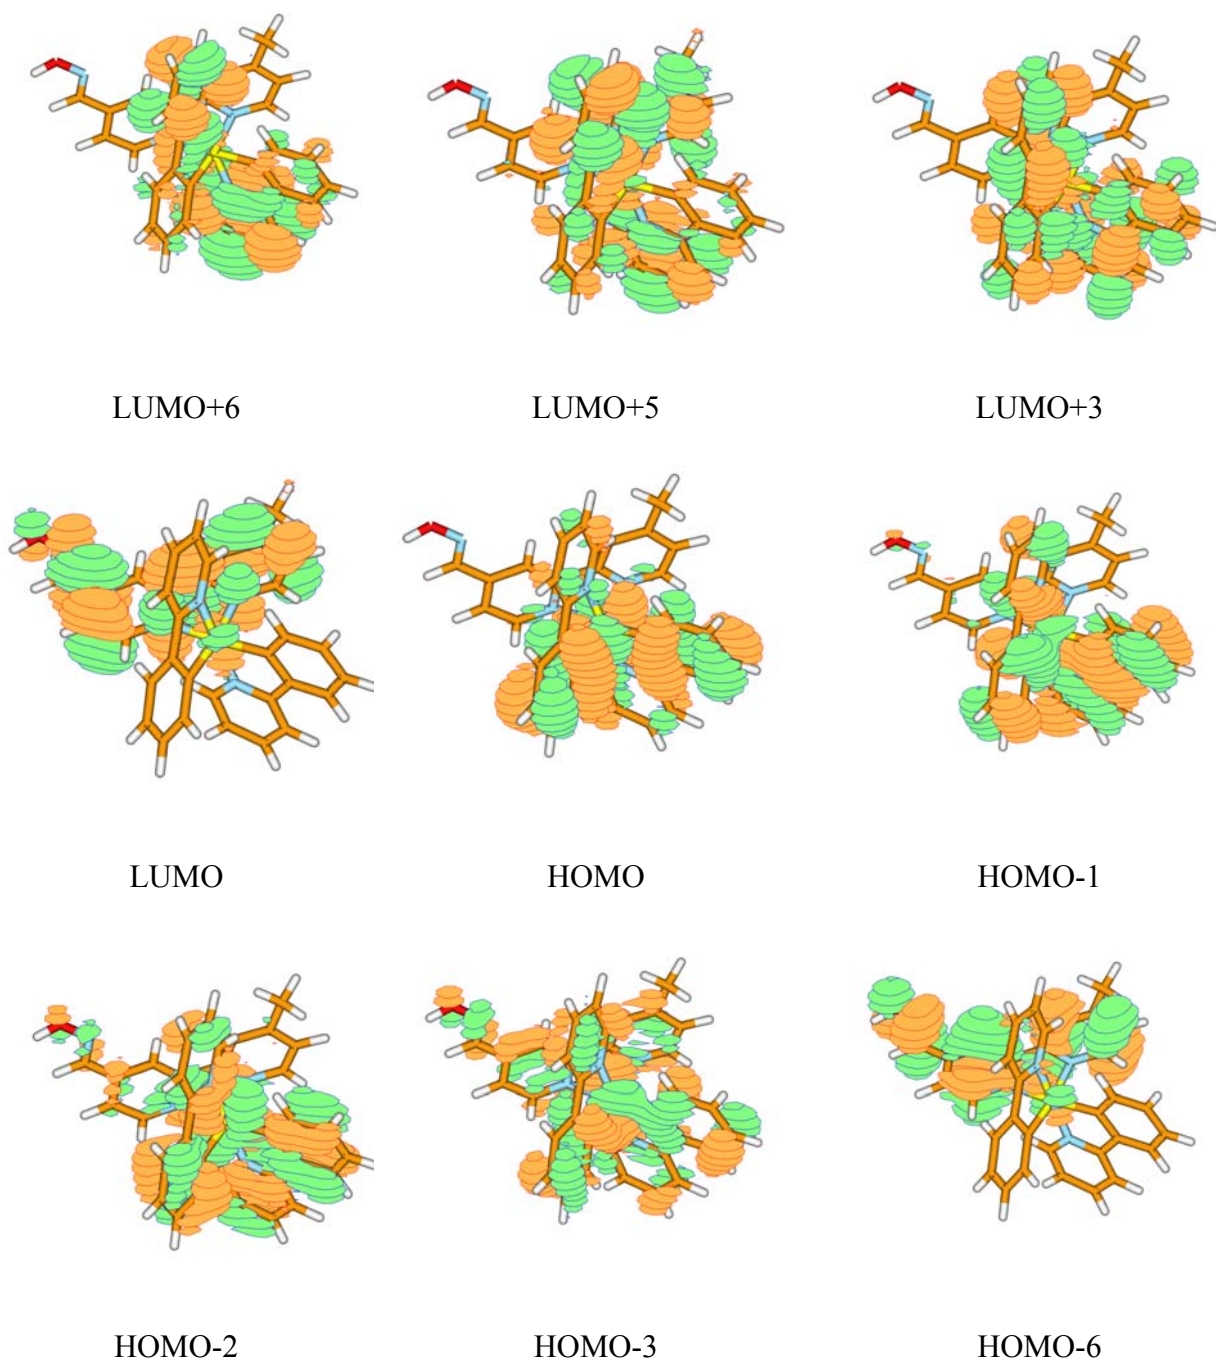

**Fig. S7** Electron-density diagrams of the frontier molecular orbitals involved in the absorption of (E)-1 in DMF solution.

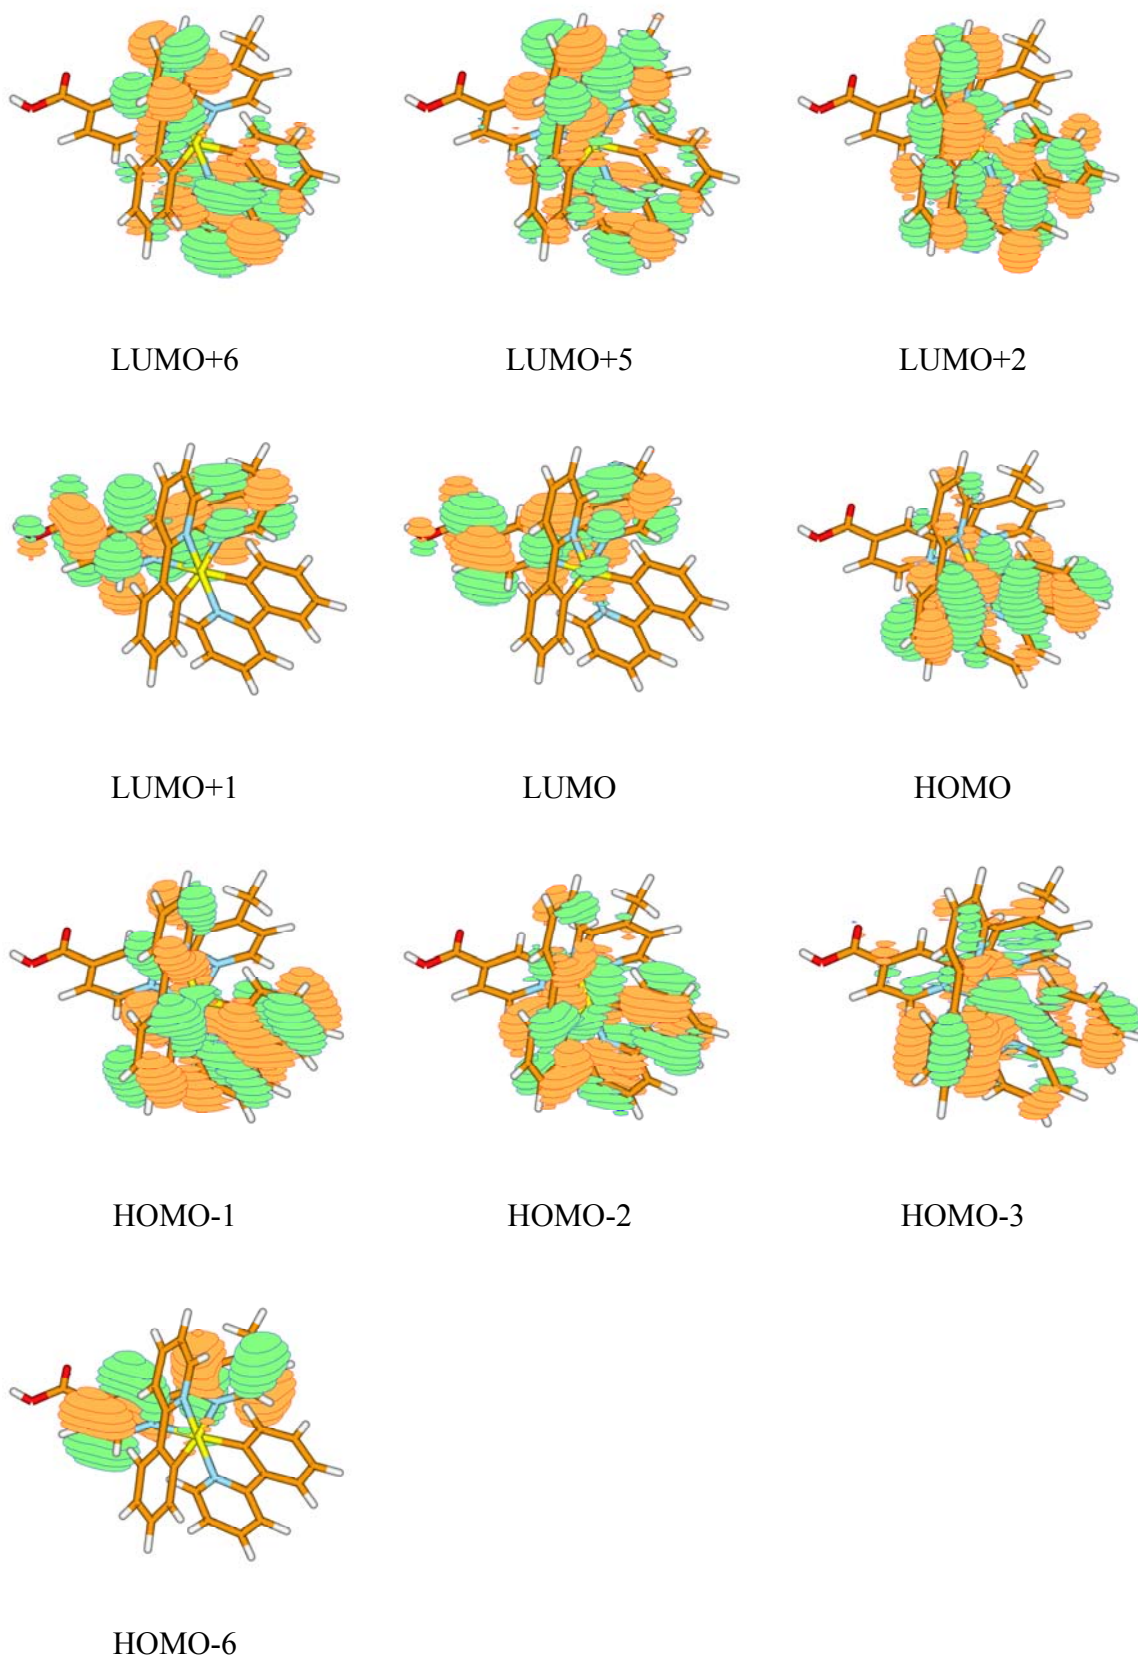

**Fig. S9** Electron-density diagrams of the frontier molecular orbitals involved in the absorption of **2** in DMF solution.
